# Supplementary material
Source: Springer Nature journal article supplement (https://www.springermedizin.de/resource/supplementary/12887_2002_19_MOESM1_ESM.pdf/9477102)

# Breastfeeding Rates

- ◆ Any Breastfeeding
- Exclusive Breastfeeding

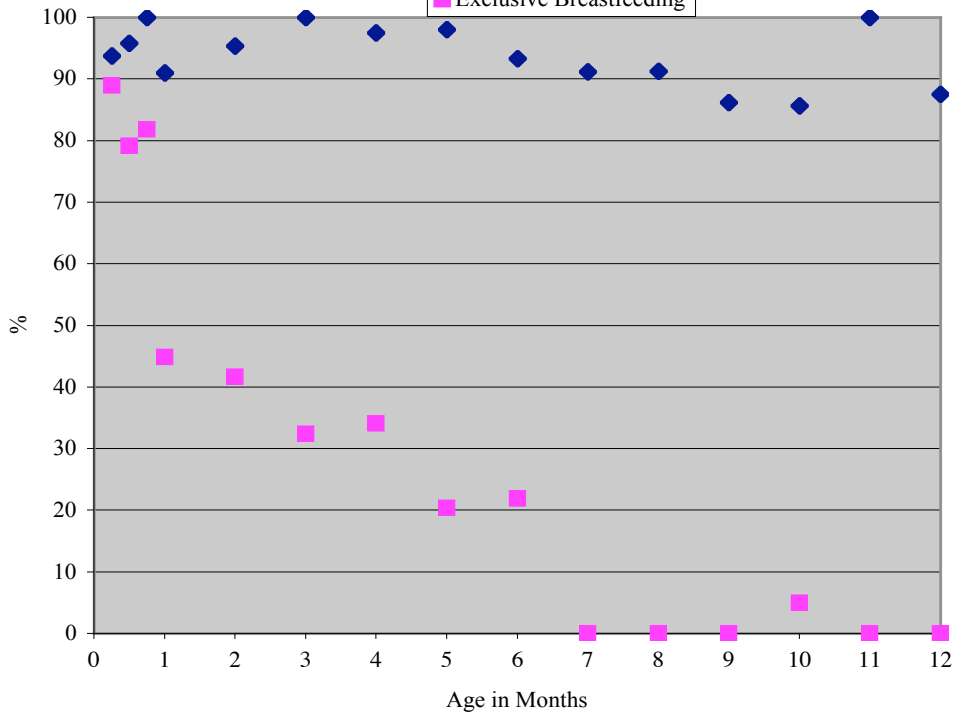

Supplement: MOESM1 [file 9477102]
